# Supplementary material for: UV-Enhanced Ethanol Sensing Properties of RF Magnetron-Sputtered ZnO Film
Source: MDPI journal article supplement (doi:10.3390/s18010050), 2017-12-26
Supplement: s1 [file s1]

## Supporting information

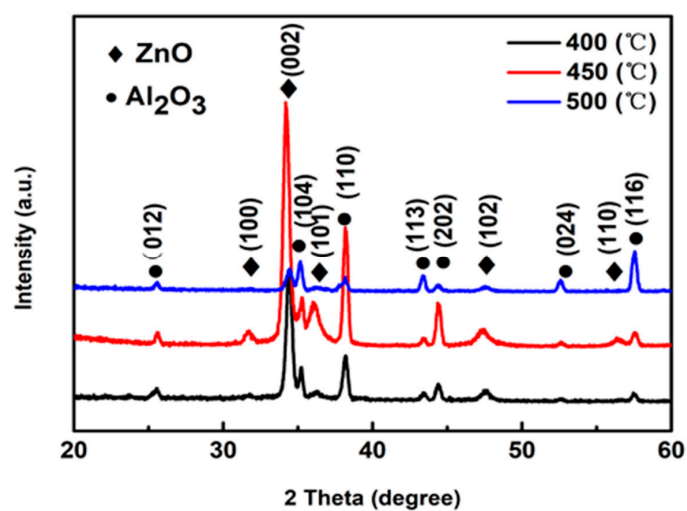

**Fig. S1** XRD patterns of the ZnO film annealed at 400 °C, 450 °C and 500 °C, respectively.

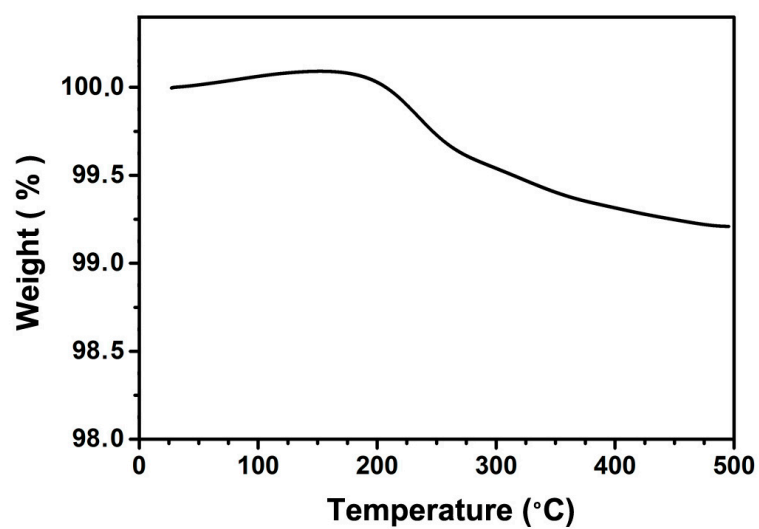

**Fig. S2** TGA of the ZnO film from room temperature to 500 °C

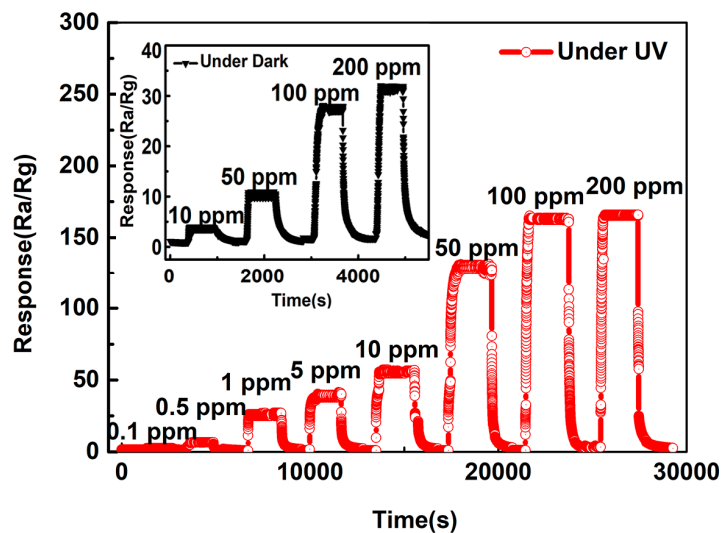

**Fig. S3** Response curve of the ZnO film sensor to different concentrations of  $C_2H_5OH$  from 0.1 to 200 ppm under dark and under UV LED activation.

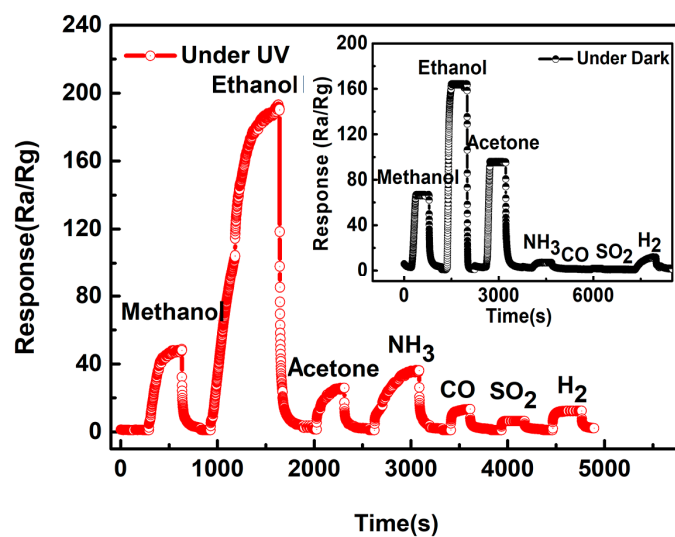

**Fig. S4** Responses curve of the ZnO film sensor to various gases of 1000 ppm under dark and under UV light illumination.
